# Supplementary material
Source: Copernicus journal article supplement (doi:10.5194/we-26-71-2026)
Supplement: Supplementary file 1 [file we-26-71-2026-supplement.pdf]

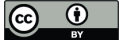

*Supplement of*

**Intraspecific neighbourhood effects on male and female fitness in *Moricandia moricandioides***

**Camilo Ferrón et al.**

*Correspondence to:* Camilo Ferrón ([camilo.ferron@urjc.es](mailto:camilo.ferron@urjc.es))

The copyright of individual parts of the supplement might differ from the article licence.

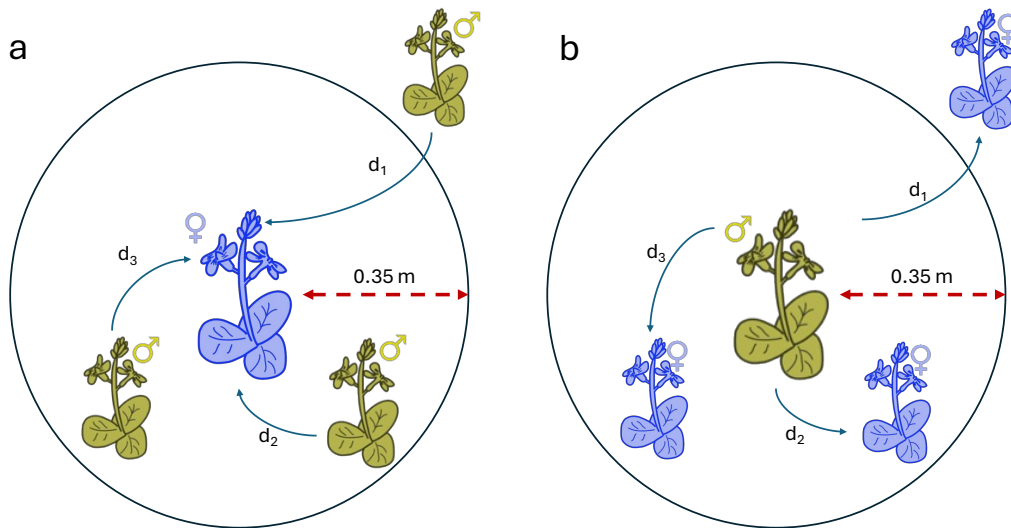

**Figure S1. Schematic representation of the mean cross distance with the pollen donors (a) and mean cross distance with the pollen receptors (b). Left circle represents a focal plant as pollen receptor (in blue) surrounded by neighbouring individuals as pollen donors (in yellow), arrows illustrate the distance between the pollen receptor and its assigned pollen donors. Right circle represent a focal plant as pollen donor (in yellow) surrounded by neighbouring individuals as pollen receptors (in blue), arrows illustrate the distance between the pollen donor and its assigned pollen receptors.**
